# Supplementary material
Source: MDPI journal article supplement (https://www.mdpi.com/2297-8739/9/12/441)
Supplement: s1 [file s1 › separations-2091486-supplementary.pdf]

## Supplementary Material

### 1. Chemical structure

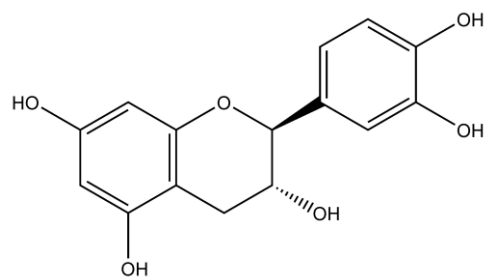

**Figures S1.** Chemical structure of (+)-catechin.

## 2. Characterization

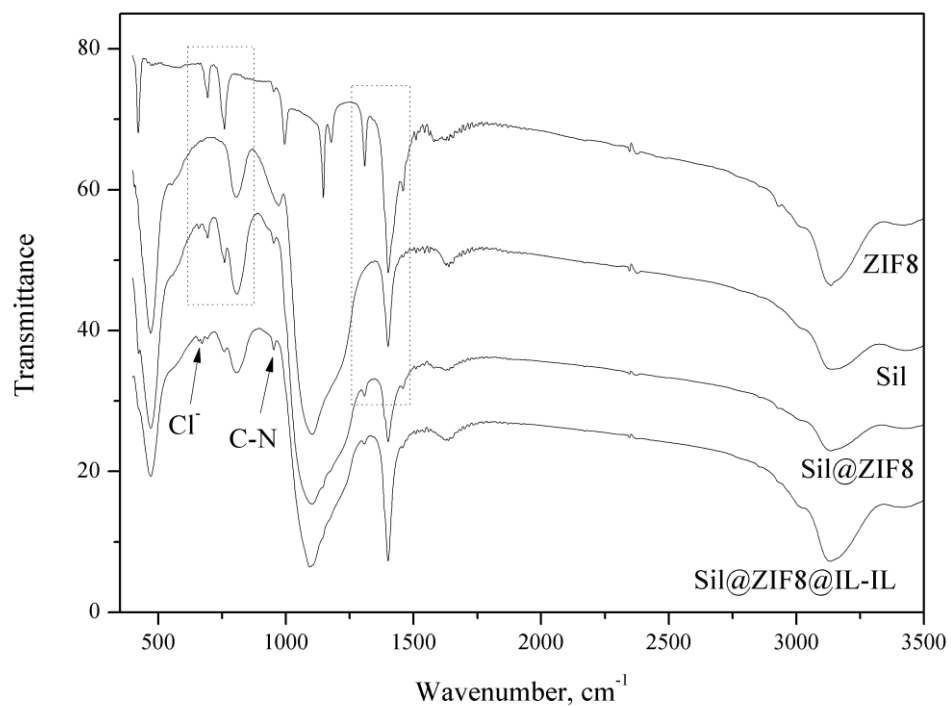

**Figure S2.** FT-IR of ZIF8, Sil, Sil@ZIF8 and one of Sil@ZIF8@IL-IL.

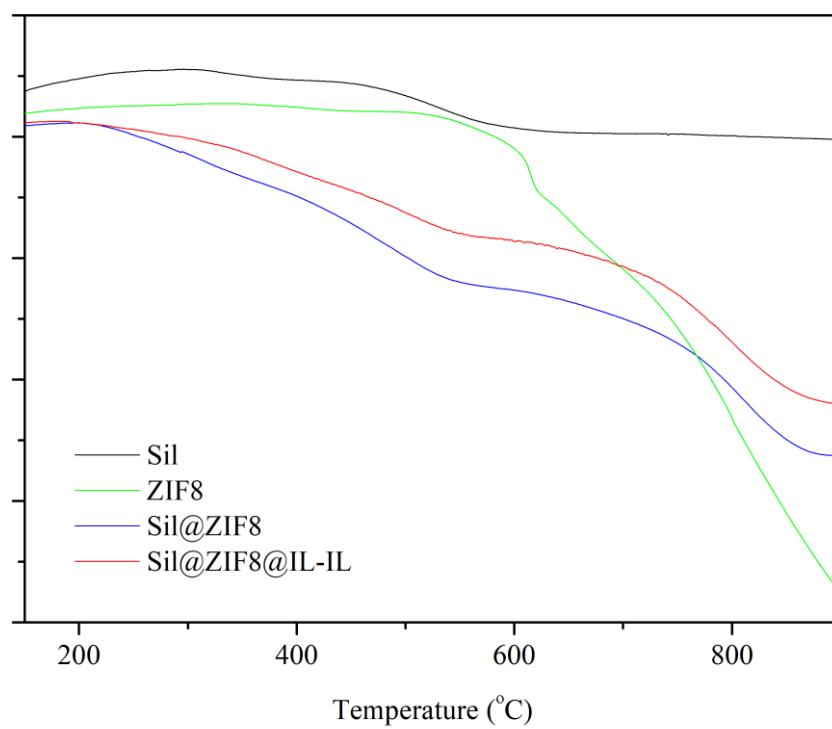

**Figure S3.** TGA analysis of ZIF8, Sil, Sil@ZIF8 and one of Sil@ZIF8@IL-IL.

### 3. Adsorption ability and isothermal study

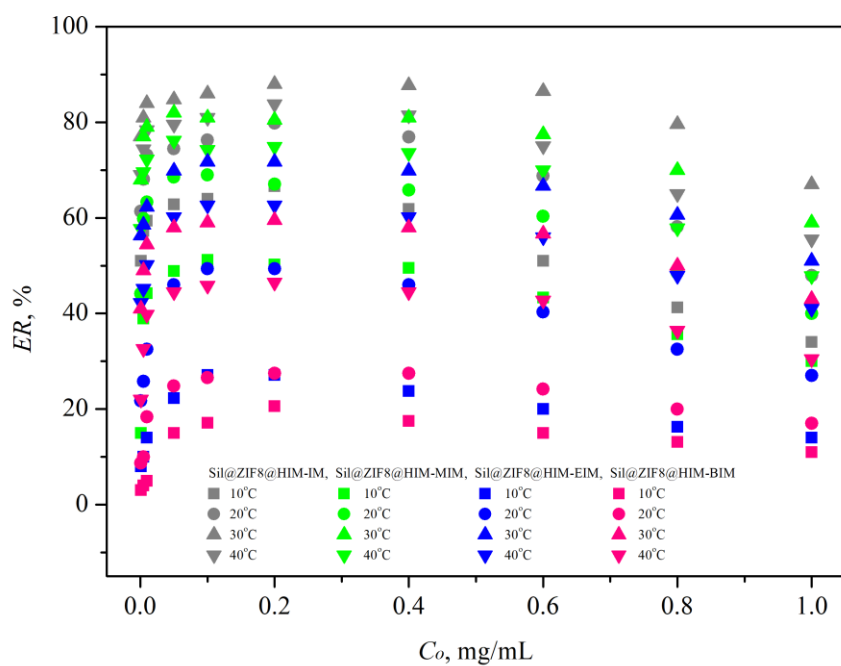

**Figure S4.** The adsorption efficiencies of four Sil@ZIF8@HIM-IL sorbents.

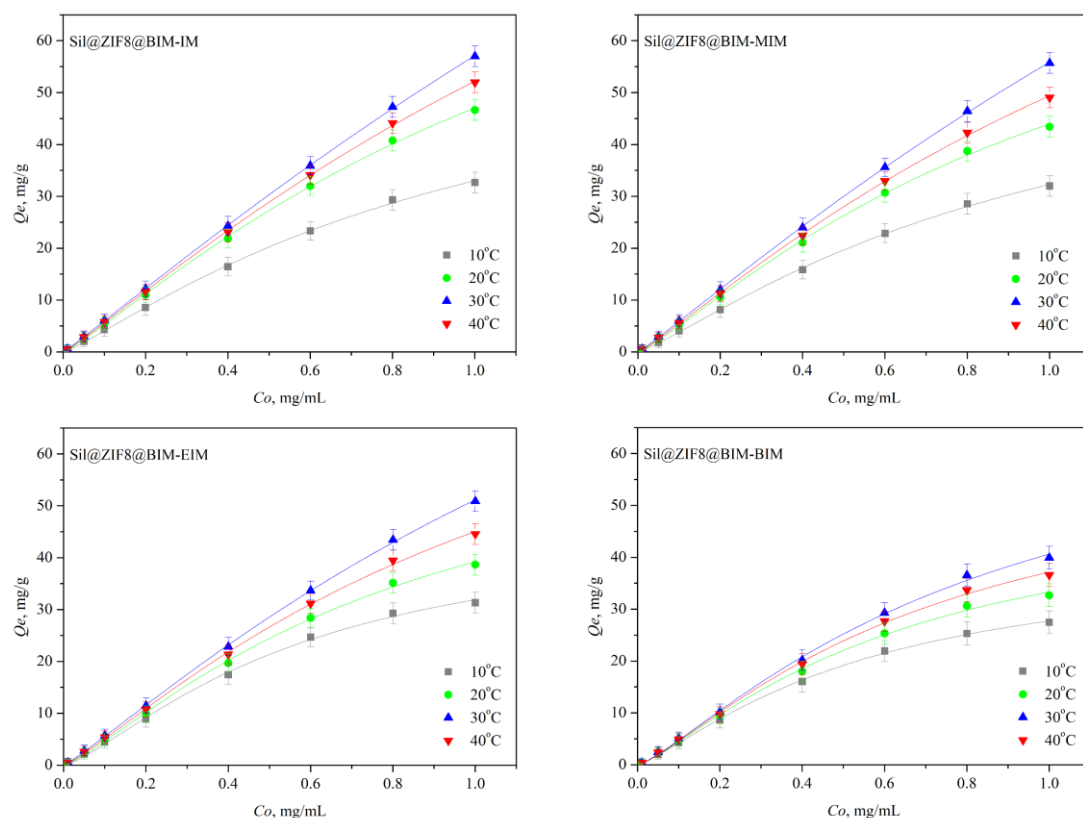

**Figure S5.** The relationships between  $C_0$  and  $Q_e$  of (+)-catechin on four Sil@ZIF8@BIM-IL sorbents at 10, 20, 30 and 40 °C.

#### 4. pH effect

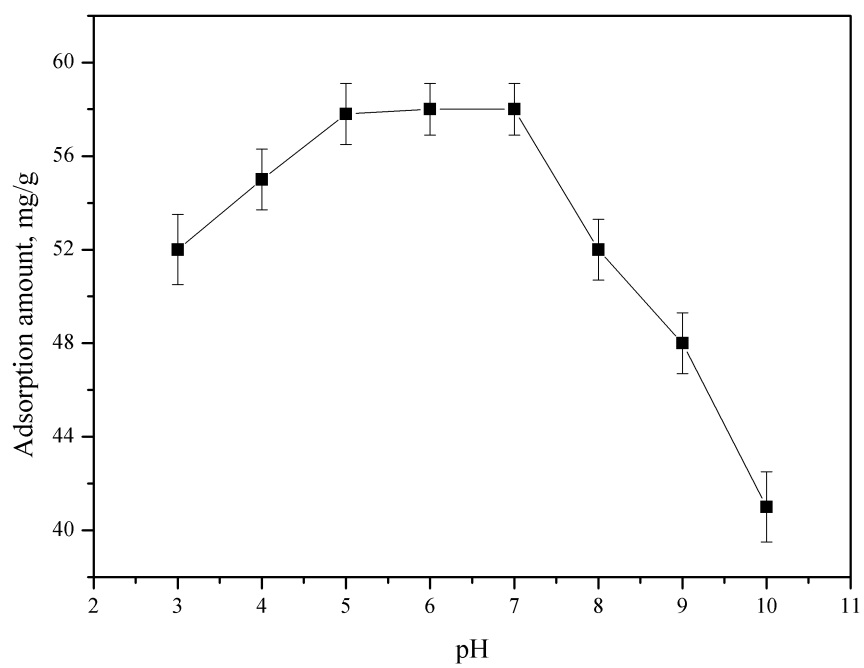

**Figure S6.** The pH effect of (+)-catechin aqueous solution on adsorption amount.
